# Supplementary material for: Metabolite profiling and transcriptomic analyses reveal an essential role of UVR8-mediated signal transduction pathway in regulating flavonoid biosynthesis in tea plants (Camellia sinensis) in response to shading
Source: BMC Plant Biol. 2018 Oct 12;18:233. doi: 10.1186/s12870-018-1440-0 (PMC6186127; doi:10.1186/s12870-018-1440-0)
Supplement: Supplementary file 4 — Transcript abundance of potential TFs involved in the flavonoid biosynthetic pathway annotated in tea transcriptome datasets. (XLSX 12 kb) [file 12870_2018_1440_MOESM4_ESM.xlsx]

## Sheet: Additional file 4
	Additional file 4. Transcript abundance of potential genes involved in the UVR8-mediated signal transduction pathway annotated in tea transcriptome datasets.
	Gene	Number	Unigenes ID	Length	Accession Number	E.Value	Log2 (FPKMS80-90%/FPKMControl)
				（bp）	(NCBI, Swiss-Prot)		S 4h	S 8h	S 2d	S 8d	S 14d
	UVR8	3	TRINITY_DN20370_c0_g2_i4	2318	NR|XP_010652533	1.31e-173	-0.07	-0.06	-0.07	-0.05	0.14
			TRINITY_DN22620_c0_g1_i2	2456	NR|XP_016744764	0	-0.02	0.16	0.23	-0.02	0.04
			TRINITY_DN23055_c3_g6_i1	827	NR|XP_009769437	3.16e-07	-0.92	-0.01	0.51	-0.04	0.1
	UVR8_L	1	TRINITY_DN27587_c4_g1_i3	2222	NR|XP_018821826	0	-1.20**	-1.30**	-1.11**	-0.45	0.47
	COP1	2	TRINITY_DN26623_c6_g1_i12	4880	NR|XP_011007762	2.6e-135	-0.04	0.01	-0.08	-0.27	0.05
			TRINITY_DN26879_c2_g1_i4	3307	NR|XP_002270330	0	-0.33	-0.4	-0.38	-0.29	-0.02
	HY5	1	TRINITY_DN27931_c0_g3_i1	651	NR|XP_011039712	2.39e-09	-1.63*	-2.30*	-0.87	-1.05*	-0.39
	FHY1		TRINITY_DN19197_c0_g1_i3	2279	NR|XP_009611239	1.74e-46	0.02	-0.19	-0.04	0.24	0.48
	FHY3	2	TRINITY_DN27407_c5_g1_i1	1057	SP|Q9LIE5	1.64e-57	0.03	-0.12	-0.15	0.06	0.08
			TRINITY_DN33380_c4_g1_i16	4610	NR|XP_002268503	0	0.01	0.05	-0.08	-0.1	0.05
	SPA1	1	TRINITY_DN22509_c1_g1_i5	8186	SP|Q9SYX2	0	-0.05	-0.07	-0.19	-0.02	0.01
	RUP1	2	TRINITY_DN26492_c1_g1_i2	2569	SP|Q94BM7	1.33e-20	-0.44	-0.75	-0.77	-0.5	0.15
			TRINITY_DN26647_c0_g1_i4	1656	SP|Q94BM7	1.45e-21	-0.26	-0.29	-0.4	-0.36	-0.09
	RUP2	1	TRINITY_DN34568_c2_g3_i1	1513	SP|Q9FFA7	2.51e-137	-0.84**	-0.64*	-0.55	-0.97**	-0.24
	BBX24	1	TRINITY_DN23150_c0_g1_i2	2063	SP|Q96288	7.46e-61	-0.08	-0.19	-0.12	0.15	0.38
	RCD1	4	TRINITY_DN37800_c2_g2_i1	1017	NR|XP_019080275	1.85e-152	0.06	0.05	0.07	-0.07	0.12
			TRINITY_DN27524_c0_g2_i6	2799	SP|Q8RY59	7.69e-69	-0.1	0.04	0.09	0.13	0.22
			TRINITY_DN37800_c2_g1_i7	2675	SP|Q8RY59	7.8e-92	0.19	0.22	0.19	0.11	0.12
			TRINITY_DN31161_c2_g1_i2	585	NR|XP_011018493	1.69e-06	-0.13	0.25	-0.27	-0.47	-0.05
	RCD_L	1	TRINITY_DN25595_c2_g1_i26	1498	NR|XP_010268411	9.75e-145	0.1	-0.21	-0.05	-0.02	0.19
	RCD_H	2	TRINITY_DN29080_c3_g1_i4	1126	SP|Q6NWL4	4.84e-06	-1.09	1.27	0.24	0.05	-0.7
			TRINITY_DN38769_c3_g2_i1	424	SP|Q6P819	2.57e-76	0.18	0.41	-0.13	0.51	0.72**
	*P≤0.05,**P≤0.01.
